# Supplementary material for: Mapping mechanical properties of organic thin films by force-modulation microscopy in aqueous media
Source: publisher site journal article supplement (doi:10.3762/bjnano.3.53), 2012-06-26
Supplement: Additional file 1 [file 2190-4286-3-53-S1.pdf]

## **Supporting Information**

**for**

### **Mapping mechanical properties of organic thin films by force-modulation microscopy in aqueous media**

Jianming Zhang<sup>1,2,§</sup>, Zehra Parlak<sup>1,2,3,§</sup>, Carleen M. Bowers<sup>4</sup>, Terrence Oas<sup>3</sup>, and Stefan Zauscher<sup>\*1,2</sup>

Address: <sup>1</sup>Department of Mechanical Engineering and Materials Science, Duke University, Durham, North Carolina 27708, USA, <sup>2</sup>Center for Biologically Inspired Materials and Materials Systems, Duke University, Durham, North Carolina 27708, USA, <sup>3</sup>Department of Biochemistry, Box 3711, Duke University Medical Center, Durham, North Carolina 27710, USA and <sup>4</sup>Department of Chemistry, Duke University, Durham, North Carolina 27708, USA

Email: Prof. Stefan Zauscher - [zauscher@duke.edu](mailto:zauscher@duke.edu)

\* Corresponding Author

§ These authors contributed equally to the paper

#### **Force modulation of the cantilever response**

The contact between the AFM tip and the surface can be modeled by Hertzian contact theory. In Hertzian contact models, the applied contact force,  $F$ , has the following relation with the indentation ( $h$ ):

$$F = \frac{4}{3} E^* \sqrt{R} h^{\frac{3}{2}}, \quad (1)$$

where  $R$  is the tip radius and  $E^*$  is the reduced Young's modulus.  $E^*$  is a function of the Young's moduli of the surface and the tip ( $E_s$  and  $E_t$ ), and the Poisson ratio of the surface and the tip ( $\nu_s$  and  $\nu_t$ ),

$$E^* = \left( \frac{1-\nu_t^2}{E_t} + \frac{1-\nu_s^2}{E_s} \right)^{-1}. \quad (2)$$

In FMM, the contact of the tip and the surface is modulated, while a higher contact force is applied. One can apply a Taylor series expansion to Equation 1 to determine indentation modulation,  $\delta$ , for the added force modulation ( $F_{ac}$ ):

$$F_{ac} = \frac{\partial F}{\partial h} \delta + \frac{1}{2} \frac{\partial^2 F}{\partial h^2} \delta^2 + \frac{1}{6} \frac{\partial^3 F}{\partial h^3} \delta^3 \dots \quad (3)$$

To stabilize the system, the contact force equilibrates with the force on the cantilever which can be expressed by using the cantilever deflection and the stiffness ( $k_c$ ):

$$F_{ac} = k_c (z_0 \sin \omega t - \delta), \quad (4)$$

where  $z_0$  is the amplitude of the actuation and  $\omega$  is the radial frequency of the actuation. Since the sample surface is indented with the applied modulation, the cantilever deflects as much as  $u_c$ , the difference between the modulation and the indentation:

$$u_c = z_0 \sin \omega t - \delta. \quad (5)$$

When the force modulation is much smaller than the contact force, the first term of Equation 3 is higher than other terms and the contact can be modeled by a linear spring. The stiffness of this spring is called the contact stiffness,  $k^*$ :

$$\frac{\partial F}{\partial h} = k^* = \sqrt[3]{6FRE^{*2}}. \quad (6)$$

However, the second- and higher-order terms become more prominent when low contact forces are applied. The quadratic term in Equation 3 is

$$\frac{\partial^2 F}{\partial h^2} = \beta = \sqrt[3]{\frac{4R^2E^4}{3F}}. \quad (7)$$

### 1. Linear contact regime

For small modulation amplitudes and high contact forces, the first term of Equation 3 is enough to capture the force modulation, and the force equilibrium can be written as

$$F_{ac} = k^* \delta = k_c (z_0 \sin \omega t - \delta). \quad (8)$$

The cantilever deflection,  $u_c$ , can then be reduced to the following expression:

$$u_c = \frac{k^*}{k^* + k_c} z_0 \sin \omega t. \quad (9)$$

### 2. Nonlinear contact regime

Low contact forces are desired for imaging compliant samples but this causes the second and higher orders of Equation 3 to rise. To understand the force modulation with small nonlinearity, let's assume that the second term in Equation 3 is sufficient. In this case, the force equilibrium is

$$F_{ac} = k^* \delta + \frac{1}{2} \beta \delta^2 = k_c (z_0 \sin \omega t - \delta). \quad (10)$$

When the quadratic equation in Equation 10 is solved,  $\delta$  can be deduced:

$$\delta = \frac{k^* + k_c}{\beta} \left( -1 \pm \sqrt{1 + \frac{2k_c \beta z_0 \sin \omega t}{(k^* + k_c)^2}} \right). \quad (11)$$

Since a negative  $\delta$  is not physically meaningful, the positive root is selected and the square root is expanded in a second-order Taylor series:

$$\begin{aligned} \delta &= \frac{k^* + k_c}{\beta} \left( -1 + 1 + \frac{k_c \beta z_0 \sin \omega t}{(k^* + k_c)^2} - \frac{(k_c \beta z_0 \sin \omega t)^2}{2(k^* + k_c)^4} \right) \\ &= \frac{k_c z_0 \sin \omega t}{k^* + k_c} - \frac{k_c^2 \beta z_0^2 (\sin \omega t)^2}{2(k^* + k_c)^3}. \end{aligned} \quad (12)$$

The cantilever deflection shown in Equation 5 can then be obtained by using this nonlinear indentation:

$$u_c = \frac{k^*}{k^* + k_c} z_0 \sin \omega t + \frac{k_c^2 \beta z_0^2 (\sin \omega t)^2}{2(k^* + k_c)^3}. \quad (13)$$

Equation 13 can be rewritten by using trigonometric identities:

$$u_c = \frac{k_c^2 \beta z_0^2}{4(k^* + k_c)^3} + \frac{k^*}{k^* + k_c} z_0 \sin \omega t - \frac{k_c^2 \beta z_0^2 \cos(2\omega t)}{4(k^* + k_c)^3}. \quad (14)$$
